# Supplementary material for: Two-Way Social Media Messaging in Postoperative Cataract Surgical Patients: Prospective Interventional Study
Source: PubMed Central journal article supplement (PMC5750422; doi:10.2196/jmir.8330), 2017-12-19
Supplement: jmir_v19i12e413_app6.pdf [file jmir_v19i12e413_app6.pdf]

MULTIMEDIA APPENDIX 3: Patient Feedback Questionnaire Regarding LINE Messages

| <b>Patient Feedback Questions</b>                                                                       |                      |                             |                 |                   |                         |
|---------------------------------------------------------------------------------------------------------|----------------------|-----------------------------|-----------------|-------------------|-------------------------|
| Question                                                                                                | 1                    | 2                           | 3               | 4                 | 5                       |
| 1. How do you rate the <b>number</b> of LINE messages received?                                         | Too many             | Ok, could be less           | Just right      | Ok, could be more | Not frequent enough     |
| 2. How do you rate the <b>content</b> of the message?                                                   | Not helpful          | Slightly helpful            | Just right      | Helpful           | Very helpful            |
| 3. If you know someone who will have cataract surgery in the future, would you recommend LINE messages? | No, do not recommend | Recommend with reservations | Does not matter | Yes, recommend    | Yes, Strongly recommend |
