# Supplementary material for: Two-Way Social Media Messaging in Postoperative Cataract Surgical Patients: Prospective Interventional Study
Source: PubMed Central journal article supplement (PMC5750422; doi:10.2196/jmir.8330), 2017-12-19
Supplement: jmir_v19i12e413_app9.pdf [file jmir_v19i12e413_app9.pdf]

## MULTIMEDIA APPENDIX 10: Message Response Types and Media Forms

|                                  | <b>Number (%) of Responses</b> |              |
|----------------------------------|--------------------------------|--------------|
|                                  | <b>n</b>                       | <b>(%)</b>   |
| <b>Response types N=270</b>      |                                |              |
| Thank you                        | 188                            | (70)         |
| Question                         | 82                             | (30)         |
| Total                            | 270                            | (100)        |
| <b>Question types N=82</b>       |                                |              |
| Administrative issue             | 31                             | (38)         |
| Post-op care                     | 28                             | (34)         |
| Symptoms                         | 23                             | (28)         |
| Total                            | 82                             | (100)        |
| <b>Response media form N=270</b> |                                |              |
| Photo                            | 25                             | (9)          |
| Sticker or emoji                 | 102                            | (38)         |
| Typed message                    | 143                            | (53)         |
| <b>Total</b>                     | <b>270</b>                     | <b>(100)</b> |
